# Supplementary material for: Simultaneous selection for yield-related traits and susceptibility to Fusarium head blight in spring wheat RIL population
Source: PubMed Central journal article supplement — Breed Sci. 2016 Mar 1;66(2):281–92. doi: 10.1270/jsbbs.66.281 (PMC4785005; doi:10.1270/jsbbs.66.281), 2016-03-01
Supplement: 66_281_1.pdf [file 66_281_1.pdf]

Supplemental Table 1. Meteorological data for years of experiment

| Year              | Sum of precipitation<br>(in mm) |      |       | Temperature (in °C) |      |      |
|-------------------|---------------------------------|------|-------|---------------------|------|------|
|                   | May                             | June | July  | May                 | June | July |
| 2010              | 109.7                           | 25.8 | 84.3  | 11.5                | 17.4 | 22.1 |
| 2011              | 38.6                            | 78.5 | 135.2 | 13.2                | 17.3 | 17.3 |
| 2012              | 44.9                            | 71.5 | 143.1 | 14.7                | 15.8 | 18.7 |
| Long-term average | 56.0                            | 68.2 | 81.5  | 14.3                | 17.2 | 19.0 |

Supplemental Table 2. Characteristics of the SSR markers used in the study

| Primer  | Chromosome | Primer sequence (5'-3')                                | Tm (°C) | Repeat                                                 |
|---------|------------|--------------------------------------------------------|---------|--------------------------------------------------------|
| Xgwm389 | 3B         | F: ATCATGTTCGATCTCCTTGACG<br>R: TGCCATGCACATTAGCAGAT   | 60      | (CT) <sub>14</sub> (GT) <sub>16</sub>                  |
| Xgwm533 | 3B         | F: AAGGCGAATCAAACGGAATA<br>R: GTTGCTTTAGGGGAAAAGCC     | 60      | (CT) <sub>18</sub> (CA) <sub>20</sub>                  |
| Xgwm566 | 3B         | F: TCTGTCTACCCATGGGATTTG<br>R: CTGGCTTCGAGGTAAGCAAC    | 60      | (CA) <sub>21</sub> (GA) <sub>2</sub> (TA) <sub>8</sub> |
| Xgwm341 | 3D         | F: TTCAGTGGTAGCGGTCGAG<br>R: CCGACATCTCATGGATCCAC      | 55      | (CT) <sub>26</sub>                                     |
| Xgwm149 | 4B         | F: CATTGTTTTCTGCCTCTAGCC<br>R: CTAGCATCGAACCTGAACAAG   | 55      | (GA) <sub>23imp*</sub>                                 |
| Xwmc238 | 4B         | F: TCTTCCTGCTTACCCAAACACA<br>R: TACTGGGGGATCGTGGATGACA | 64      | (CA) <sub>22</sub>                                     |
| Xgwm304 | 5A         | F: AGGAAACAGAAATATCGCGG<br>R: AGGACTGTGGGGAATGAATG     | 55      | (CT) <sub>22</sub>                                     |
| Xgwm156 | 5A         | F: CCAACCGTGCTATTAGTCATTC<br>R: CAATGCAGGCCCTCCTAAC    | 60      | (GT) <sub>14</sub>                                     |
| Xgwm46  | 7B         | F: GCACGTGAATGGATTGGAC<br>R: TGACCCAATAGTGGTGGTCA      | 60      | (GA) <sub>2</sub> GC(GA) <sub>33</sub>                 |

\*iner-MITE polymorphism

Supplemental Table 3 . Estimates of the contrast between mean values of analysed traits for awned and awnless groups of lines in three environments\*

| Environment         | FDK1  | FDK2  | KWS_C  | KWS_I  | TKW_C | TKW_I | KWS_R (%) | TKW_R (%) |
|---------------------|-------|-------|--------|--------|-------|-------|-----------|-----------|
| 2010                | -0.76 | -1.35 | 0.058* | 0.005* | 2.78* | 1.90* | -2.82     | 0.11*     |
| 2011                | -3.93 | -4.18 | 0.041* | 0.029* | 1.41* | 2.36* | 1.37*     | 4.56*     |
| 2012                | -1.28 | -2.35 | 0.077* | 0.016* | 1.88* | 1.09* | -2.86     | 0.89*     |
| LSD <sub>0.05</sub> | 2.41  | 2.60  | 0.023  |        | 0.74  |       | 1.86      | 1.30      |

\*Positive value indicates awned group has higher mean value than awnless group

Supplemental Table 4. Mean values (over 3 years) of analyzed traits in Zebra x Saar RIL population

| No. of line | Awned/Awnless | Line    | FDK1  | FDK2  | KWS_I | KWS_C | KWS_R | TKW_I | TKW_C | TKW_R |
|-------------|---------------|---------|-------|-------|-------|-------|-------|-------|-------|-------|
| 1           | awned         | SAAR    | 33.06 | 41.23 | 0.38  | 0.68  | 58.54 | 23.86 | 33.65 | 68.97 |
| 2           | awned         | Z/S 4   | 33.73 | 47.46 | 0.31  | 0.70  | 43.84 | 12.61 | 27.41 | 45.99 |
| 3           | awned         | Z/S 10  | 30.27 | 43.22 | 0.33  | 0.82  | 40.61 | 18.87 | 32.27 | 58.48 |
| 4           | awned         | Z/S 14  | 31.21 | 44.38 | 0.40  | 1.04  | 38.84 | 19.31 | 36.03 | 53.58 |
| 5           | awned         | Z/S 15  | 41.33 | 50.36 | 0.34  | 1.00  | 33.84 | 17.35 | 37.28 | 46.56 |
| 6           | awned         | Z/S 18  | 32.51 | 43.58 | 0.40  | 1.10  | 36.64 | 19.38 | 39.24 | 49.40 |
| 7           | awned         | Z/S 20  | 31.44 | 41.31 | 0.44  | 1.04  | 42.18 | 20.34 | 36.90 | 55.12 |
| 8           | awned         | Z/S 21  | 37.03 | 48.18 | 0.39  | 0.80  | 49.20 | 18.26 | 32.27 | 56.61 |
| 9           | awned         | Z/S 28  | 35.00 | 45.98 | 0.38  | 1.06  | 35.69 | 18.66 | 36.95 | 50.50 |
| 10          | awned         | Z/S 40  | 24.82 | 34.40 | 0.49  | 0.78  | 62.52 | 17.81 | 30.97 | 57.51 |
| 11          | awned         | Z/S 41  | 33.24 | 45.09 | 0.42  | 0.74  | 57.35 | 18.87 | 32.12 | 58.75 |
| 12          | awned         | Z/S 43  | 41.43 | 56.07 | 0.39  | 0.76  | 51.12 | 18.06 | 36.05 | 50.10 |
| 13          | awned         | Z/S 55  | 37.54 | 50.40 | 0.39  | 0.84  | 46.77 | 19.49 | 34.24 | 56.93 |
| 14          | awned         | Z/S 65  | 42.69 | 52.99 | 0.34  | 0.82  | 41.17 | 19.24 | 36.57 | 52.61 |
| 15          | awned         | Z/S 66  | 29.08 | 39.89 | 0.33  | 0.81  | 41.30 | 18.05 | 31.80 | 56.75 |
| 16          | awned         | Z/S 70  | 20.21 | 26.42 | 0.43  | 0.87  | 49.81 | 23.72 | 36.54 | 64.93 |
| 17          | awned         | Z/S 75  | 21.73 | 30.39 | 0.44  | 0.95  | 45.87 | 20.25 | 37.25 | 54.36 |
| 18          | awned         | Z/S 77  | 32.31 | 42.78 | 0.32  | 0.73  | 43.77 | 16.23 | 31.21 | 52.00 |
| 19          | awned         | Z/S 140 | 37.57 | 46.99 | 0.38  | 0.80  | 48.15 | 18.09 | 31.35 | 57.72 |
| 20          | awned         | Z/S 182 | 52.79 | 63.17 | 0.35  | 0.72  | 48.84 | 19.40 | 32.01 | 60.61 |
| 21          | awned         | Z/S 214 | 39.39 | 46.67 | 0.44  | 0.86  | 51.82 | 21.65 | 36.48 | 59.36 |
| 22          | awned         | Z/S 216 | 34.23 | 41.84 | 0.50  | 1.09  | 45.95 | 24.53 | 39.81 | 61.60 |
| 23          | awned         | Z/S 217 | 16.03 | 22.88 | 0.48  | 0.97  | 49.55 | 23.32 | 35.95 | 64.86 |
| 24          | awned         | Z/S 220 | 32.90 | 41.83 | 0.46  | 1.20  | 38.36 | 26.10 | 40.41 | 64.57 |
| 25          | awned         | Z/S 221 | 21.48 | 27.02 | 0.51  | 0.94  | 53.53 | 23.21 | 36.54 | 63.52 |
| 26          | awned         | Z/S 222 | 29.15 | 38.37 | 0.51  | 1.05  | 48.64 | 21.59 | 35.26 | 61.24 |
| 27          | awnless       | Z/S 9   | 32.86 | 42.34 | 0.34  | 0.69  | 49.50 | 18.38 | 32.23 | 57.04 |
| 28          | awnless       | Z/S 26  | 39.88 | 52.55 | 0.34  | 0.79  | 42.54 | 14.72 | 30.35 | 48.49 |
| 29          | awnless       | Z/S 27  | 33.92 | 46.16 | 0.35  | 0.72  | 48.24 | 15.05 | 29.83 | 50.47 |
| 30          | awnless       | Z/S 39  | 31.51 | 42.98 | 0.36  | 0.72  | 50.58 | 17.91 | 32.78 | 54.63 |
| 31          | awnless       | Z/S 42  | 36.58 | 50.11 | 0.40  | 0.72  | 55.47 | 16.70 | 32.97 | 50.66 |
| 32          | awnless       | Z/S 44  | 43.43 | 54.90 | 0.37  | 0.70  | 53.65 | 18.49 | 36.19 | 51.10 |
| 33          | awnless       | Z/S 45  | 41.33 | 52.45 | 0.30  | 0.72  | 41.90 | 16.66 | 30.27 | 55.04 |
| 34          | awnless       | Z/S 67  | 33.41 | 46.69 | 0.36  | 0.79  | 46.31 | 14.92 | 30.54 | 48.84 |
| 35          | awnless       | Z/S 87  | 28.52 | 39.15 | 0.35  | 0.66  | 53.20 | 14.52 | 31.24 | 46.49 |
| 36          | awnless       | Z/S 190 | 41.70 | 54.75 | 0.39  | 0.70  | 55.09 | 18.32 | 33.31 | 55.02 |
| 37          | awnless       | Z/S 215 | 35.78 | 48.29 | 0.39  | 0.79  | 49.57 | 20.40 | 35.23 | 57.89 |
| 38          | awnless       | Z/S 218 | 23.39 | 30.70 | 0.54  | 0.80  | 67.23 | 22.59 | 34.59 | 65.31 |
| 39          | awnless       | Z/S 219 | 24.34 | 26.60 | 0.43  | 0.64  | 66.75 | 22.84 | 32.32 | 70.66 |
| 40          | awned         | Z/S 1   | 26.22 | 36.46 | 0.41  | 0.72  | 56.46 | 15.53 | 30.25 | 51.36 |
| 41          | awned         | Z/S 2   | 19.77 | 31.51 | 0.37  | 0.68  | 54.54 | 17.71 | 35.51 | 49.88 |
| 42          | awned         | Z/S 3   | 28.29 | 39.10 | 0.41  | 0.78  | 52.30 | 18.03 | 34.78 | 51.82 |
| 43          | awned         | Z/S 7   | 32.23 | 42.23 | 0.42  | 0.82  | 51.42 | 19.12 | 31.91 | 59.92 |
| 44          | awned         | Z/S 12  | 21.89 | 30.53 | 0.41  | 0.76  | 54.43 | 18.25 | 31.98 | 57.08 |
| 45          | awned         | Z/S 16  | 25.45 | 34.97 | 0.44  | 0.85  | 52.11 | 22.19 | 38.10 | 58.24 |

|    |         |         |       |       |      |      |       |       |       |       |
|----|---------|---------|-------|-------|------|------|-------|-------|-------|-------|
| 46 | awned   | Z/S 24  | 30.48 | 40.65 | 0.42 | 0.85 | 49.84 | 20.46 | 34.94 | 58.55 |
| 47 | awned   | Z/S 31  | 40.22 | 49.63 | 0.40 | 0.94 | 43.02 | 23.02 | 36.79 | 62.57 |
| 48 | awned   | Z/S 33  | 43.74 | 50.92 | 0.40 | 0.94 | 43.14 | 23.37 | 34.98 | 66.79 |
| 49 | awned   | Z/S 49  | 37.69 | 45.52 | 0.44 | 0.95 | 46.41 | 26.52 | 40.30 | 65.79 |
| 50 | awned   | Z/S 57  | 35.36 | 43.90 | 0.52 | 0.79 | 66.15 | 22.89 | 35.21 | 65.00 |
| 51 | awned   | Z/S 58  | 22.13 | 24.13 | 0.57 | 0.92 | 62.21 | 24.54 | 37.57 | 65.31 |
| 52 | awned   | Z/S 59  | 24.45 | 33.30 | 0.43 | 0.80 | 54.09 | 20.52 | 36.48 | 56.25 |
| 53 | awned   | Z/S 61  | 40.74 | 48.09 | 0.40 | 0.73 | 54.99 | 24.08 | 37.09 | 64.93 |
| 54 | awned   | Z/S 62  | 44.49 | 55.23 | 0.38 | 0.78 | 48.50 | 22.06 | 37.84 | 58.30 |
| 55 | awned   | Z/S 63  | 34.79 | 47.76 | 0.39 | 0.91 | 43.55 | 19.59 | 37.92 | 51.66 |
| 56 | awned   | Z/S 64  | 28.97 | 41.37 | 0.30 | 0.75 | 39.96 | 16.98 | 34.53 | 49.17 |
| 57 | awned   | Z/S 68  | 33.63 | 44.44 | 0.43 | 0.85 | 50.97 | 20.75 | 36.19 | 57.33 |
| 58 | awned   | Z/S 73  | 22.65 | 32.77 | 0.36 | 0.77 | 46.73 | 18.36 | 34.56 | 53.11 |
| 59 | awned   | Z/S 74  | 31.17 | 41.54 | 0.31 | 0.82 | 38.12 | 21.97 | 38.52 | 57.03 |
| 60 | awned   | Z/S 83  | 22.83 | 34.14 | 0.40 | 0.82 | 48.84 | 17.98 | 35.20 | 51.09 |
| 61 | awned   | Z/S 105 | 25.62 | 34.66 | 0.46 | 0.78 | 58.62 | 18.40 | 35.29 | 52.14 |
| 62 | awned   | Z/S 107 | 39.61 | 49.27 | 0.39 | 0.85 | 46.29 | 19.92 | 37.85 | 52.62 |
| 63 | awned   | Z/S 108 | 29.91 | 38.10 | 0.45 | 0.74 | 60.53 | 21.35 | 35.60 | 59.97 |
| 64 | awned   | Z/S 109 | 43.74 | 56.81 | 0.28 | 0.74 | 37.76 | 13.05 | 30.82 | 42.35 |
| 65 | awned   | Z/S 110 | 37.26 | 50.03 | 0.33 | 0.82 | 40.37 | 18.12 | 34.91 | 51.90 |
| 66 | awned   | Z/S 209 | 33.18 | 41.65 | 0.46 | 0.80 | 58.33 | 21.67 | 37.82 | 57.29 |
| 67 | awned   | Z/S 212 | 32.59 | 36.80 | 0.54 | 0.92 | 58.62 | 28.49 | 43.76 | 65.10 |
| 68 | awned   | Z/S 213 | 25.17 | 32.38 | 0.50 | 0.83 | 60.37 | 27.48 | 38.24 | 71.88 |
| 69 | awnless | Z/S 5   | 24.08 | 33.97 | 0.48 | 0.75 | 63.85 | 19.47 | 35.92 | 54.19 |
| 70 | awnless | Z/S 8   | 36.43 | 47.89 | 0.31 | 0.70 | 44.03 | 16.21 | 29.18 | 55.54 |
| 71 | awnless | Z/S 17  | 30.50 | 42.30 | 0.37 | 0.66 | 56.73 | 17.57 | 33.39 | 52.63 |
| 72 | awnless | Z/S 19  | 29.68 | 42.67 | 0.36 | 0.83 | 43.71 | 16.45 | 32.34 | 50.87 |
| 73 | awnless | Z/S 30  | 45.35 | 57.87 | 0.47 | 1.07 | 43.53 | 18.90 | 34.02 | 55.55 |
| 74 | awnless | Z/S 34  | 46.75 | 54.62 | 0.32 | 0.78 | 40.96 | 16.20 | 30.58 | 52.97 |
| 75 | awnless | Z/S 84  | 27.25 | 40.99 | 0.45 | 0.86 | 52.01 | 15.98 | 32.78 | 48.74 |
| 76 | awnless | Z/S 106 | 29.07 | 36.54 | 0.40 | 0.70 | 57.02 | 14.99 | 35.01 | 42.82 |
| 77 | awnless | Z/S 192 | 31.24 | 41.00 | 0.36 | 0.63 | 56.61 | 16.49 | 30.08 | 54.84 |
| 78 | awnless | Z/S 208 | 35.17 | 43.38 | 0.38 | 0.71 | 53.60 | 20.15 | 32.66 | 61.69 |
| 79 | awnless | Z/S 210 | 39.17 | 50.62 | 0.42 | 0.81 | 51.89 | 19.84 | 35.59 | 55.74 |
| 80 | awnless | Z/S 211 | 30.09 | 47.02 | 0.36 | 0.75 | 48.15 | 15.55 | 30.42 | 51.13 |
| 81 | awnless | ZEBRA   | 20.74 | 31.42 | 0.42 | 0.64 | 65.48 | 19.06 | 30.96 | 59.92 |
| 82 | awned   | Z/S 13  | 26.01 | 34.24 | 0.56 | 0.80 | 70.60 | 26.38 | 41.80 | 63.10 |
| 83 | awned   | Z/S 22  | 30.29 | 40.04 | 0.46 | 0.80 | 58.33 | 21.17 | 37.21 | 56.90 |
| 84 | awned   | Z/S 23  | 37.29 | 51.10 | 0.38 | 0.75 | 49.79 | 18.07 | 34.94 | 51.70 |
| 85 | awned   | Z/S 29  | 30.45 | 39.96 | 0.48 | 0.77 | 61.90 | 18.16 | 34.76 | 52.25 |
| 86 | awned   | Z/S 47  | 26.50 | 37.66 | 0.49 | 0.74 | 66.52 | 21.45 | 35.34 | 60.69 |
| 87 | awned   | Z/S 48  | 33.89 | 40.50 | 0.52 | 0.85 | 60.92 | 21.50 | 36.76 | 58.48 |
| 88 | awned   | Z/S 50  | 29.41 | 37.75 | 0.48 | 0.76 | 63.23 | 20.71 | 33.66 | 61.53 |
| 89 | awned   | Z/S 51  | 24.86 | 36.48 | 0.44 | 0.69 | 63.58 | 19.58 | 36.81 | 53.21 |
| 90 | awned   | Z/S 53  | 25.16 | 36.25 | 0.45 | 0.73 | 62.22 | 22.61 | 39.33 | 57.50 |
| 91 | awned   | Z/S 54  | 28.46 | 38.05 | 0.45 | 0.74 | 61.21 | 21.78 | 35.07 | 62.11 |
| 92 | awned   | Z/S 60  | 27.23 | 36.67 | 0.47 | 0.77 | 60.60 | 23.71 | 37.48 | 63.26 |
| 93 | awned   | Z/S 71  | 21.44 | 29.25 | 0.44 | 0.79 | 56.26 | 19.73 | 35.06 | 56.26 |
| 94 | awned   | Z/S 72  | 21.59 | 30.61 | 0.51 | 0.72 | 70.89 | 18.77 | 35.28 | 53.20 |
| 95 | awned   | Z/S 88  | 31.18 | 41.81 | 0.47 | 0.82 | 57.53 | 16.83 | 34.56 | 48.69 |
| 96 | awned   | Z/S 91  | 35.27 | 46.45 | 0.39 | 0.74 | 53.20 | 14.07 | 30.75 | 45.75 |
| 97 | awned   | Z/S 93  | 29.36 | 38.99 | 0.35 | 0.78 | 44.64 | 20.63 | 37.73 | 54.68 |
| 98 | awned   | Z/S 94  | 21.66 | 32.55 | 0.36 | 0.84 | 43.15 | 19.52 | 37.91 | 51.48 |
| 99 | awned   | Z/S 96  | 31.53 | 43.22 | 0.41 | 0.88 | 47.29 | 17.69 | 34.51 | 51.26 |

|     |       |         |       |       |      |      |       |       |       |       |
|-----|-------|---------|-------|-------|------|------|-------|-------|-------|-------|
| 100 | awned | Z/S 97  | 28.06 | 37.28 | 0.39 | 0.77 | 51.30 | 19.63 | 37.83 | 51.89 |
| 101 | awned | Z/S 98  | 30.76 | 42.36 | 0.39 | 0.73 | 53.00 | 19.90 | 35.81 | 55.57 |
| 102 | awned | Z/S 99  | 28.38 | 39.20 | 0.36 | 0.80 | 44.88 | 21.17 | 37.39 | 56.62 |
| 103 | awned | Z/S 100 | 29.30 | 40.16 | 0.32 | 0.72 | 44.68 | 17.51 | 34.55 | 50.66 |
| 104 | awned | Z/S 112 | 30.18 | 41.70 | 0.48 | 0.77 | 61.96 | 19.04 | 35.49 | 53.64 |
| 105 | awned | Z/S 113 | 20.42 | 29.07 | 0.52 | 0.85 | 61.05 | 22.33 | 36.80 | 60.69 |
| 106 | awned | Z/S 115 | 33.97 | 43.60 | 0.42 | 0.85 | 49.88 | 19.71 | 40.26 | 48.96 |
| 107 | awned | Z/S 118 | 25.46 | 38.51 | 0.47 | 0.75 | 62.83 | 19.11 | 38.23 | 49.98 |
| 108 | awned | Z/S 119 | 23.51 | 33.15 | 0.45 | 0.72 | 62.87 | 18.75 | 32.52 | 57.65 |
| 109 | awned | Z/S 120 | 15.49 | 24.80 | 0.55 | 0.77 | 71.82 | 21.25 | 34.91 | 60.85 |
| 110 | awned | Z/S 121 | 29.91 | 36.50 | 0.47 | 0.76 | 60.92 | 21.05 | 35.40 | 59.48 |
| 111 | awned | Z/S 124 | 28.56 | 39.09 | 0.44 | 0.75 | 58.14 | 18.92 | 33.25 | 56.91 |
| 112 | awned | Z/S 125 | 24.99 | 35.15 | 0.42 | 0.70 | 59.95 | 19.21 | 35.45 | 54.20 |
| 113 | awned | Z/S 126 | 27.08 | 34.04 | 0.52 | 0.77 | 67.82 | 22.82 | 33.31 | 68.50 |
| 114 | awned | Z/S 127 | 29.59 | 38.43 | 0.52 | 0.77 | 67.24 | 20.41 | 33.15 | 61.57 |
| 115 | awned | Z/S 128 | 27.35 | 35.91 | 0.40 | 0.73 | 55.37 | 19.31 | 31.11 | 62.05 |
| 116 | awned | Z/S 130 | 49.35 | 58.43 | 0.37 | 0.77 | 48.15 | 19.06 | 33.01 | 57.73 |
| 117 | awned | Z/S 133 | 44.82 | 55.30 | 0.35 | 0.72 | 49.05 | 17.24 | 31.47 | 54.78 |
| 118 | awned | Z/S 134 | 43.45 | 52.44 | 0.38 | 0.75 | 50.26 | 18.34 | 34.09 | 53.81 |
| 119 | awned | Z/S 135 | 41.56 | 52.67 | 0.35 | 0.79 | 43.92 | 20.34 | 38.23 | 53.20 |
| 120 | awned | Z/S 136 | 41.06 | 50.01 | 0.33 | 0.63 | 53.15 | 15.42 | 30.41 | 50.71 |
| 121 | awned | Z/S 145 | 23.63 | 32.00 | 0.45 | 0.67 | 67.55 | 22.66 | 35.35 | 64.12 |
| 122 | awned | Z/S 146 | 40.21 | 49.63 | 0.41 | 0.64 | 63.99 | 20.33 | 34.37 | 59.15 |
| 123 | awned | Z/S 149 | 33.39 | 46.10 | 0.41 | 0.72 | 57.26 | 16.68 | 33.31 | 50.08 |
| 124 | awned | Z/S 152 | 17.21 | 24.92 | 0.49 | 0.82 | 59.74 | 18.20 | 30.10 | 60.48 |
| 125 | awned | Z/S 154 | 25.21 | 36.80 | 0.54 | 0.99 | 54.35 | 17.90 | 40.28 | 44.44 |
| 126 | awned | Z/S 155 | 25.54 | 38.82 | 0.49 | 0.78 | 62.59 | 17.72 | 35.17 | 50.38 |
| 127 | awned | Z/S 156 | 28.46 | 39.07 | 0.42 | 0.69 | 60.97 | 20.48 | 39.58 | 51.74 |
| 128 | awned | Z/S 157 | 30.76 | 41.55 | 0.40 | 0.62 | 65.26 | 19.50 | 33.53 | 58.15 |
| 129 | awned | Z/S 158 | 51.19 | 60.10 | 0.35 | 0.69 | 49.89 | 20.21 | 36.77 | 54.97 |
| 130 | awned | Z/S 159 | 25.63 | 39.49 | 0.39 | 0.74 | 53.25 | 19.08 | 37.68 | 50.64 |
| 131 | awned | Z/S 160 | 25.51 | 34.40 | 0.37 | 0.63 | 59.60 | 19.83 | 31.40 | 63.17 |
| 132 | awned | Z/S 162 | 32.36 | 41.20 | 0.41 | 0.62 | 65.62 | 21.65 | 33.64 | 64.36 |
| 133 | awned | Z/S 163 | 24.72 | 38.14 | 0.43 | 0.72 | 59.49 | 21.90 | 36.04 | 60.76 |
| 134 | awned | Z/S 164 | 34.69 | 47.52 | 0.39 | 0.87 | 44.71 | 18.95 | 36.80 | 51.49 |
| 135 | awned | Z/S 165 | 30.99 | 41.03 | 0.42 | 0.70 | 59.20 | 20.91 | 36.18 | 57.78 |
| 136 | awned | Z/S 168 | 30.24 | 39.42 | 0.49 | 0.87 | 56.38 | 28.82 | 43.92 | 65.62 |
| 137 | awned | Z/S 169 | 21.83 | 30.70 | 0.49 | 0.79 | 62.62 | 17.41 | 33.62 | 51.78 |
| 138 | awned | Z/S 170 | 32.36 | 41.78 | 0.44 | 0.88 | 49.78 | 21.41 | 35.22 | 60.78 |
| 139 | awned | Z/S 172 | 28.37 | 37.81 | 0.43 | 0.80 | 53.21 | 22.03 | 36.20 | 60.86 |
| 140 | awned | Z/S 173 | 34.59 | 46.24 | 0.36 | 0.80 | 44.99 | 17.29 | 33.19 | 52.09 |
| 141 | awned | Z/S 174 | 48.10 | 56.53 | 0.32 | 0.72 | 44.39 | 21.92 | 35.57 | 61.61 |
| 142 | awned | Z/S 176 | 25.47 | 32.77 | 0.48 | 0.84 | 56.93 | 29.27 | 41.01 | 71.36 |
| 143 | awned | Z/S 177 | 47.07 | 54.39 | 0.34 | 0.78 | 43.45 | 21.39 | 33.41 | 64.04 |
| 144 | awned | Z/S 178 | 43.36 | 52.12 | 0.39 | 0.77 | 50.28 | 20.25 | 33.24 | 60.93 |
| 145 | awned | Z/S 181 | 19.58 | 24.83 | 0.44 | 0.66 | 66.00 | 19.99 | 33.13 | 60.33 |
| 146 | awned | Z/S 183 | 17.48 | 21.76 | 0.59 | 0.78 | 75.95 | 23.47 | 32.86 | 71.43 |
| 147 | awned | Z/S 184 | 39.75 | 49.98 | 0.47 | 0.96 | 49.39 | 20.88 | 38.07 | 54.85 |
| 148 | awned | Z/S 185 | 34.03 | 43.30 | 0.42 | 0.71 | 59.94 | 21.94 | 35.39 | 61.99 |
| 149 | awned | Z/S 193 | 41.87 | 50.13 | 0.39 | 0.80 | 49.17 | 22.46 | 34.32 | 65.44 |
| 150 | awned | Z/S 195 | 24.03 | 36.07 | 0.42 | 0.73 | 58.11 | 19.78 | 35.13 | 56.30 |
| 151 | awned | Z/S 196 | 33.75 | 44.11 | 0.42 | 0.75 | 56.00 | 20.25 | 36.51 | 55.47 |
| 152 | awned | Z/S 198 | 38.69 | 49.23 | 0.39 | 0.73 | 52.83 | 18.41 | 32.33 | 56.96 |
| 153 | awned | Z/S 199 | 53.42 | 60.60 | 0.39 | 0.87 | 44.26 | 21.81 | 38.64 | 56.44 |

|     |         |         |       |       |      |      |       |       |       |       |
|-----|---------|---------|-------|-------|------|------|-------|-------|-------|-------|
| 154 | awned   | Z/S 200 | 38.42 | 49.70 | 0.36 | 0.81 | 44.99 | 18.60 | 34.93 | 53.25 |
| 155 | awned   | Z/S 202 | 26.88 | 34.64 | 0.38 | 0.62 | 62.14 | 19.34 | 31.60 | 61.19 |
| 156 | awned   | Z/S 204 | 27.78 | 35.56 | 0.37 | 0.68 | 55.15 | 20.90 | 33.94 | 61.58 |
| 157 | awnless | Z/S 11  | 29.37 | 42.50 | 0.42 | 0.81 | 51.96 | 16.44 | 35.06 | 46.89 |
| 158 | awnless | Z/S 25  | 32.86 | 46.11 | 0.40 | 0.80 | 50.01 | 20.55 | 35.48 | 57.94 |
| 159 | awnless | Z/S 36  | 24.05 | 34.58 | 0.50 | 0.90 | 55.49 | 17.38 | 32.18 | 54.02 |
| 160 | awnless | Z/S 37  | 50.21 | 63.59 | 0.30 | 0.73 | 41.28 | 17.19 | 34.00 | 50.56 |
| 161 | awnless | Z/S 38  | 26.73 | 36.44 | 0.47 | 0.77 | 61.30 | 19.62 | 34.47 | 56.92 |
| 162 | awnless | Z/S 46  | 24.46 | 35.58 | 0.56 | 0.74 | 74.64 | 19.75 | 36.58 | 53.99 |
| 163 | awnless | Z/S 78  | 26.17 | 39.66 | 0.43 | 0.74 | 58.93 | 16.16 | 35.72 | 45.24 |
| 164 | awnless | Z/S 79  | 29.66 | 41.85 | 0.42 | 0.72 | 58.90 | 17.54 | 33.51 | 52.35 |
| 165 | awnless | Z/S 80  | 27.93 | 37.07 | 0.44 | 0.71 | 62.00 | 18.54 | 32.60 | 56.87 |
| 166 | awnless | Z/S 81  | 29.98 | 40.34 | 0.45 | 0.76 | 58.69 | 17.03 | 34.57 | 49.26 |
| 167 | awnless | Z/S 85  | 23.66 | 32.75 | 0.48 | 0.77 | 62.21 | 18.57 | 33.59 | 55.30 |
| 168 | awnless | Z/S 89  | 35.21 | 43.25 | 0.42 | 0.70 | 60.07 | 21.16 | 37.25 | 56.81 |
| 169 | awnless | Z/S 90  | 32.28 | 44.45 | 0.40 | 0.70 | 56.70 | 15.48 | 36.77 | 42.09 |
| 170 | awnless | Z/S 95  | 32.58 | 39.95 | 0.37 | 0.66 | 56.93 | 19.31 | 35.59 | 54.26 |
| 171 | awnless | Z/S 104 | 24.20 | 34.88 | 0.45 | 0.74 | 60.00 | 19.34 | 37.61 | 51.44 |
| 172 | awnless | Z/S 116 | 36.26 | 47.79 | 0.39 | 0.69 | 56.62 | 20.71 | 40.40 | 51.25 |
| 173 | awnless | Z/S 117 | 26.85 | 37.59 | 0.48 | 0.69 | 69.97 | 19.98 | 37.21 | 53.70 |
| 174 | awnless | Z/S 122 | 32.53 | 41.00 | 0.45 | 0.69 | 64.68 | 18.38 | 33.29 | 55.22 |
| 175 | awnless | Z/S 123 | 24.47 | 32.69 | 0.47 | 0.75 | 62.88 | 20.96 | 31.72 | 66.06 |
| 176 | awnless | Z/S 129 | 54.20 | 65.93 | 0.32 | 0.80 | 39.77 | 16.87 | 32.94 | 51.23 |
| 177 | awnless | Z/S 131 | 34.40 | 40.35 | 0.37 | 0.61 | 61.13 | 18.16 | 30.37 | 59.79 |
| 178 | awnless | Z/S 132 | 36.18 | 47.36 | 0.31 | 0.66 | 47.17 | 17.47 | 33.86 | 51.59 |
| 179 | awnless | Z/S 137 | 29.77 | 40.23 | 0.39 | 0.72 | 54.63 | 18.99 | 32.94 | 57.67 |
| 180 | awnless | Z/S 138 | 30.68 | 39.58 | 0.35 | 0.78 | 44.65 | 20.48 | 32.62 | 62.77 |
| 181 | awnless | Z/S 139 | 28.05 | 39.18 | 0.51 | 0.87 | 58.57 | 17.11 | 31.85 | 53.73 |
| 182 | awnless | Z/S 142 | 39.31 | 50.11 | 0.35 | 0.78 | 44.27 | 17.00 | 31.69 | 53.66 |
| 183 | awnless | Z/S 144 | 48.98 | 60.81 | 0.32 | 0.72 | 43.67 | 17.22 | 32.30 | 53.31 |
| 184 | awnless | Z/S 147 | 43.30 | 56.10 | 0.32 | 0.76 | 42.41 | 14.70 | 32.05 | 45.88 |
| 185 | awnless | Z/S 150 | 39.47 | 51.47 | 0.38 | 0.77 | 49.28 | 17.21 | 32.23 | 53.38 |
| 186 | awnless | Z/S 151 | 53.49 | 63.52 | 0.38 | 0.80 | 47.96 | 19.34 | 30.44 | 63.55 |
| 187 | awnless | Z/S 153 | 33.72 | 40.44 | 0.48 | 0.75 | 63.48 | 24.18 | 33.52 | 72.12 |
| 188 | awnless | Z/S 161 | 45.42 | 54.16 | 0.36 | 0.74 | 49.04 | 20.37 | 32.59 | 62.51 |
| 189 | awnless | Z/S 166 | 22.91 | 31.02 | 0.54 | 0.69 | 78.00 | 22.12 | 34.58 | 63.96 |
| 190 | awnless | Z/S 179 | 18.68 | 26.32 | 0.50 | 0.65 | 76.17 | 22.57 | 32.28 | 69.94 |
| 191 | awnless | Z/S 186 | 27.80 | 38.67 | 0.51 | 0.72 | 70.61 | 18.59 | 34.52 | 53.85 |
| 192 | awnless | Z/S 188 | 46.74 | 57.27 | 0.44 | 0.86 | 50.91 | 22.56 | 35.50 | 63.55 |
| 193 | awnless | Z/S 189 | 31.58 | 41.99 | 0.43 | 0.77 | 56.35 | 20.38 | 33.16 | 61.46 |
| 194 | awnless | Z/S 191 | 19.30 | 29.09 | 0.47 | 0.74 | 63.13 | 20.20 | 35.06 | 57.62 |
| 195 | awnless | Z/S 194 | 29.17 | 39.98 | 0.43 | 0.79 | 54.80 | 15.97 | 33.38 | 47.83 |
| 196 | awnless | Z/S 197 | 48.29 | 58.33 | 0.37 | 0.85 | 43.47 | 21.04 | 38.21 | 55.06 |
| 197 | awnless | Z/S 201 | 31.88 | 40.33 | 0.34 | 0.63 | 54.66 | 19.78 | 32.05 | 61.72 |
| 198 | awnless | Z/S 203 | 23.93 | 32.47 | 0.40 | 0.59 | 67.84 | 18.31 | 31.92 | 57.38 |
| 199 | awnless | Z/S 206 | 36.96 | 41.35 | 0.37 | 0.63 | 58.21 | 23.01 | 33.81 | 68.07 |
| 200 | awnless | Z/S 207 | 31.06 | 37.58 | 0.41 | 0.69 | 58.90 | 17.73 | 30.52 | 58.11 |

Supplemental Table 5. Results of statistical analysis of relationships between marker polymorphism and observed traits: *F* test—P-values

| Marker  | Source of variation | <i>F</i> test—P value |       |         |         |         |         |
|---------|---------------------|-----------------------|-------|---------|---------|---------|---------|
|         |                     | FDK1                  | FDK2  | KWS     | TKW     | KWS_R   | TKW_R   |
| Xgwm566 | Marker (M)          | < 0.001               | 0.024 | 0.692   | < 0.001 | < 0.001 | 0.055   |
|         | M × Year            | 0.288                 | 0.402 | 0.165   | 0.036   | 0.368   | 0.978   |
|         | M × Treatment       | -                     | -     | 0.000   | 0.599   |         |         |
| Xgwm46  | Marker              | 0.002                 | 0.019 | 0.058   | < 0.001 | 0.015   | 0.314   |
|         | M × Year            | 0.574                 | 0.545 | < 0.001 | < 0.001 | 0.369   | 0.018   |
|         | M × Treatment       | -                     | -     | 0.002   | 0.310   |         |         |
| Xgwm389 | Marker              | < 0.001               | 0.001 | < 0.001 | < 0.001 | 0.137   | 0.449   |
|         | M × Year            | 0.095                 | 0.271 | 0.002   | 0.004   | 0.884   | 0.219   |
|         | M × Treatment       | -                     | -     | 0.769   | 0.036   |         |         |
| Xgwm533 | Marker              | 0.001                 | 0.007 | < 0.001 | < 0.001 | 0.912   | 0.283   |
|         | M × Year            | 0.172                 | 0.325 | 0.002   | 0.001   | 0.878   | 0.062   |
|         | M × Treatment       | -                     | -     | 0.019   | 0.145   |         |         |
| Xgwm156 | Marker              | 0.113                 | 0.436 | 0.480   | 0.103   | 0.434   | 0.003   |
|         | M × Year            | 0.135                 | 0.287 | 0.263   | 0.627   | 0.623   | 0.833   |
|         | M × Treatment       | -                     | -     | 0.398   | 0.005   |         |         |
| Xgwm238 | Marker              | 0.902                 | 0.395 | < 0.001 | < 0.001 | 0.123   | < 0.001 |
|         | M × Year            | 0.001                 | 0.000 | 0.007   | 0.277   | 0.014   | 0.080   |
|         | M × Treatment       | -                     | -     | 0.886   | 0.494   |         |         |
| Xgwm341 | Marker              | 0.706                 | 0.512 | 0.114   | 0.001   | 0.614   | 0.112   |
|         | M × Year            | 0.783                 | 0.285 | 0.136   | 0.064   | 0.440   | 0.573   |
|         | M × Treatment       | -                     | -     | 0.828   | 0.019   |         |         |
